# Supplementary material
Source: MDPI journal article supplement (https://www.mdpi.com/2076-3417/8/11/2225)
Supplement: s1 [file s1]

**Table S1: Number of analyzed microorganisms via MALDI-ToF MS. In cases of triplicates, the average of analyzed microorganisms, as well as the standard deviation, is given**

| After treatment                |                | [A] Washing with water and pre-bath (180 s) | [B] Washing with PTW in pre-rinsing (10 s) | [C] Washing with PTW in pre-rinsing (30 s) | [D] Washing with PTW in pre-bath (180 s) | [E] Washing with PTW in second wash (180 s) | [F] Washing with PTW in pre-bath (180 s) in pre-rinsing (30 s) and in second wash (180 s) |
|--------------------------------|----------------|---------------------------------------------|--------------------------------------------|--------------------------------------------|------------------------------------------|---------------------------------------------|-------------------------------------------------------------------------------------------|
| [1] Endive raw material        | Not identified | 22.0 ± 2.0                                  | 20                                         | 18                                         | 19.7 ± 6.7                               | 18                                          | 18                                                                                        |
|                                | identified     | 13.33 ± 6.0                                 | 3                                          | 12                                         | 5.7 ± 5.7                                | 14                                          | 5                                                                                         |
| [2] Endive after pre-bath      | Not identified | 6.3 ± 4.0                                   | n.d.                                       | n.d.                                       | 16.0 ± 4.0                               | n.d.                                        | 8                                                                                         |
|                                | identified     | 29.0 ± 3.6                                  |                                            |                                            | 10.3 ± 5.1                               |                                             | 2                                                                                         |
| [3] Endive after pre-rinsing   | Not identified | 13.3 ± 4.6                                  | 22                                         | 10                                         | 8.3 ± 4.7                                | 16                                          | 17                                                                                        |
|                                | identified     | 3.0 ± 2.0                                   | 3                                          | 4                                          | 12.7 ± 2.5                               | 4                                           | 1                                                                                         |
| [4] Endive after first wash    | Not identified | 19.8 ± 7.4                                  | n.d.                                       | n.d.                                       | 15.0 ± 7.9                               | 12                                          | 14                                                                                        |
|                                | identified     | 5.0 ± 2.0                                   |                                            |                                            | 8.7 ± 2.1                                | 0                                           | 0                                                                                         |
| [5] Endive after second wash   | Not identified | 35.0 ± 5.6                                  | n.d.                                       | n.d.                                       | 22.0 ± 3.0                               | 21                                          | 39                                                                                        |
|                                | identified     | 9.0 ± 5.3                                   |                                            |                                            | 4.7 ± 3.5                                | 1                                           | 0                                                                                         |
| [6] Endive after final rinsing | Not identified | 22.3 ± 9.3                                  | 12                                         | 15                                         | 20 ± 2.7                                 | 32                                          | 17                                                                                        |
|                                | identified     | 5.7 ± 1.5                                   | 1                                          | 1                                          | 1.3 ± 1.5                                | 2                                           | 1                                                                                         |
| After storage                  |                | [A] Washing with water and pre-bath (180 s) | [B] Washing with PTW in pre-rinsing (10 s) | [C] Washing with PTW in pre-rinsing (30 s) | [D] Washing with PTW in pre-bath (180 s) | [E] Washing with PTW in second wash (180 s) | [F] Washing with PTW in pre-bath (180 s) in pre-rinsing (30 s) and in second wash (180 s) |
| [1] Endive raw material        | Not identified | 9.0 ± 1.7                                   | 12                                         | 8                                          | 11                                       | 14                                          | 10                                                                                        |
|                                | identified     | 6.3 ± 6.1                                   | 12                                         | 7                                          | 0                                        | 11                                          | 9                                                                                         |
| [2] Endive after pre-bath      | Not identified | 2.3 ± 0.6                                   | n.d.                                       | n.d.                                       | 16                                       | n.d.                                        | 14                                                                                        |
|                                | identified     | 14.0 ± 7.0                                  |                                            |                                            | 0                                        |                                             | 7                                                                                         |
| [3] Endive after pre-rinsing   | Not identified | 12.0 ± 5.0                                  | 6                                          | 5                                          | 26                                       | 9                                           | 5                                                                                         |
|                                | identified     | 7.3 ± 3.8                                   | 12                                         | 4                                          | 3                                        | 9                                           | 14                                                                                        |
| [4] Endive after first wash    | Not identified | 6.7 ± 3.5                                   | n.d.                                       | n.d.                                       | 23                                       | 16                                          | 11                                                                                        |
|                                | identified     | 5.0 ± 3.5                                   |                                            |                                            | 0                                        | 9                                           | 10                                                                                        |
| [5] Endive after second wash   | Not identified | 16.0 ± 2.0                                  | n.d.                                       | n.d.                                       | 10                                       | n.d.                                        | 14                                                                                        |
|                                | identified     | 9.3 ± 1.2                                   |                                            |                                            | 0                                        |                                             | 13                                                                                        |
| [6] Endive after final rinsing | Not identified | 14.7 ± 4.6                                  | 15                                         | 17                                         | 31                                       | 26                                          | 14                                                                                        |
|                                | identified     | 11.0 ± 2.7                                  | 6                                          | 4                                          | 4                                        | 1                                           | 5                                                                                         |

n.d.: not determined
